# Supplementary material for: Tributyrin Supplementation Rescues Chronic–Binge Ethanol-Induced Oxidative Stress in the Gut–Lung Axis in Mice
Source: MDPI journal article supplement (doi:10.3390/antiox13040472), 2024-04-17
Supplement: s1 [file s1]

## Tributyrin supplementation alleviates chronic-binge ethanol induced oxidative stress in the gut-lung axis

### Supplementary Materials

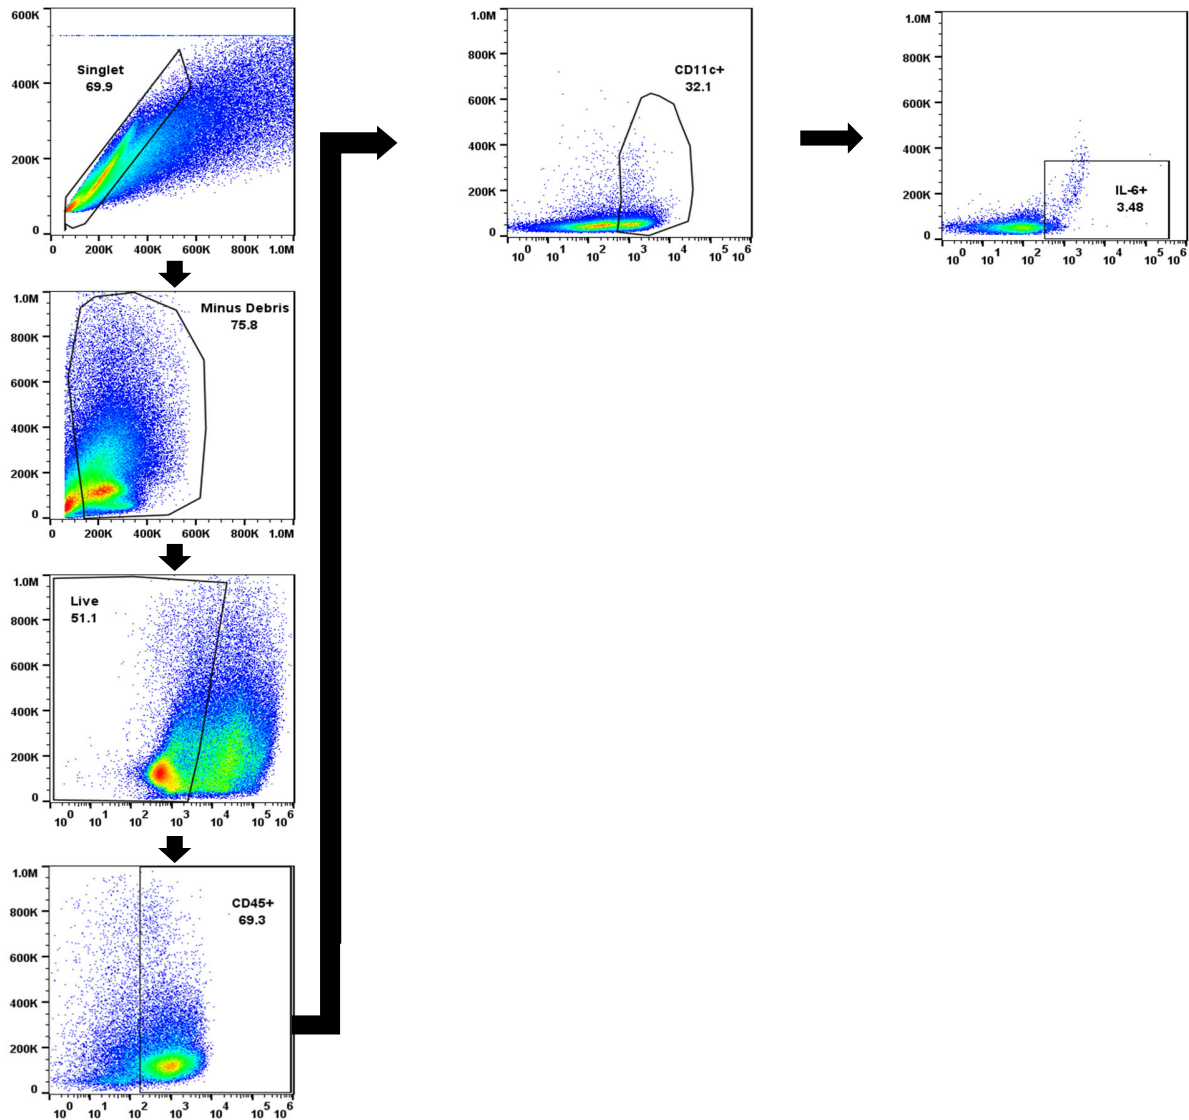

**Figure S1.** Flow gating strategy for the identification of CD11c<sup>+</sup>IL-6<sup>+</sup> cells in intraepithelial lymphocytes.

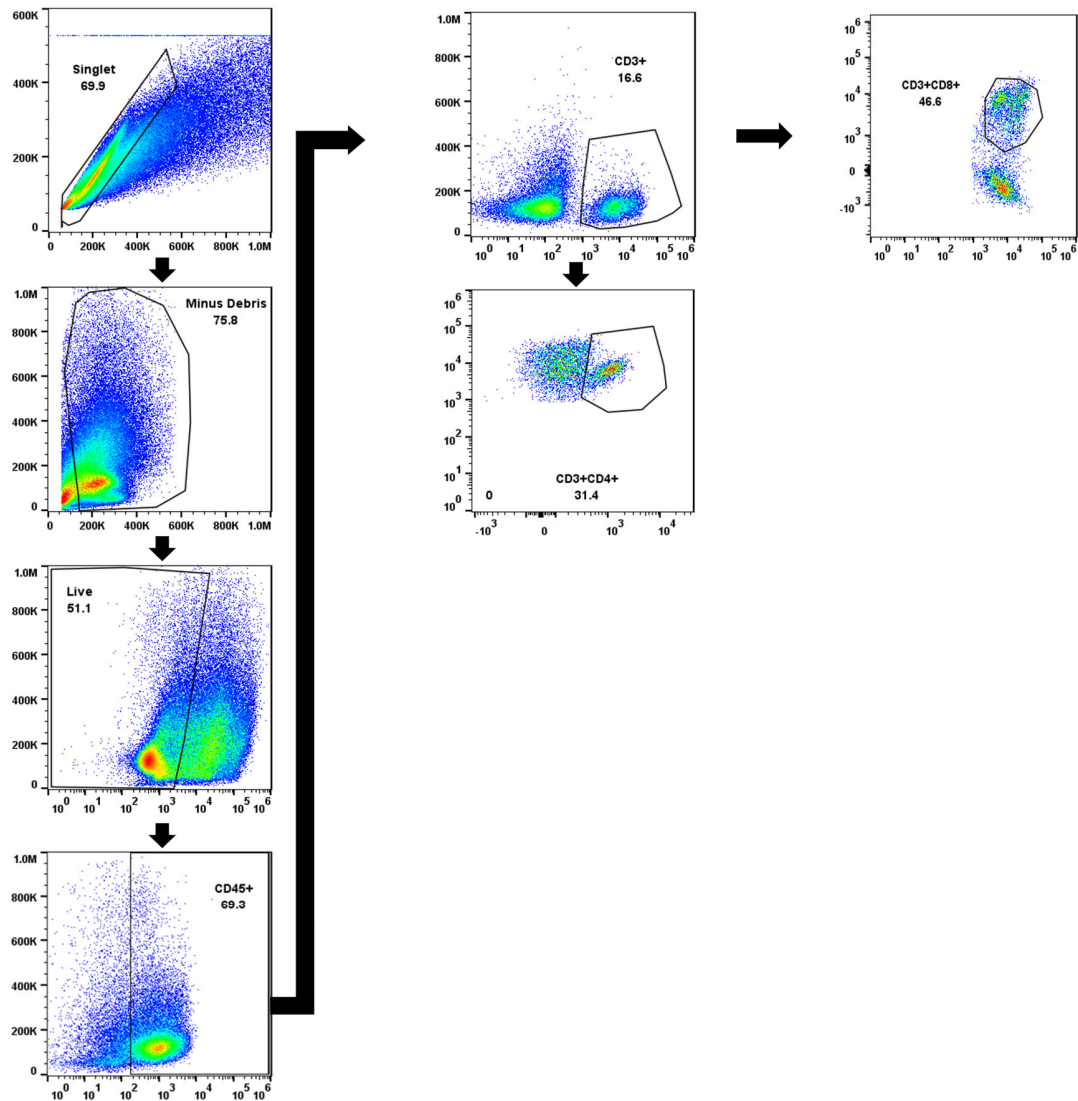

**Figure S2.** Flow gating strategy for the identification of CD3<sup>+</sup>CD4<sup>+</sup> and CD3<sup>+</sup>CD8a<sup>+</sup> cells in lamina propria lymphocytes.

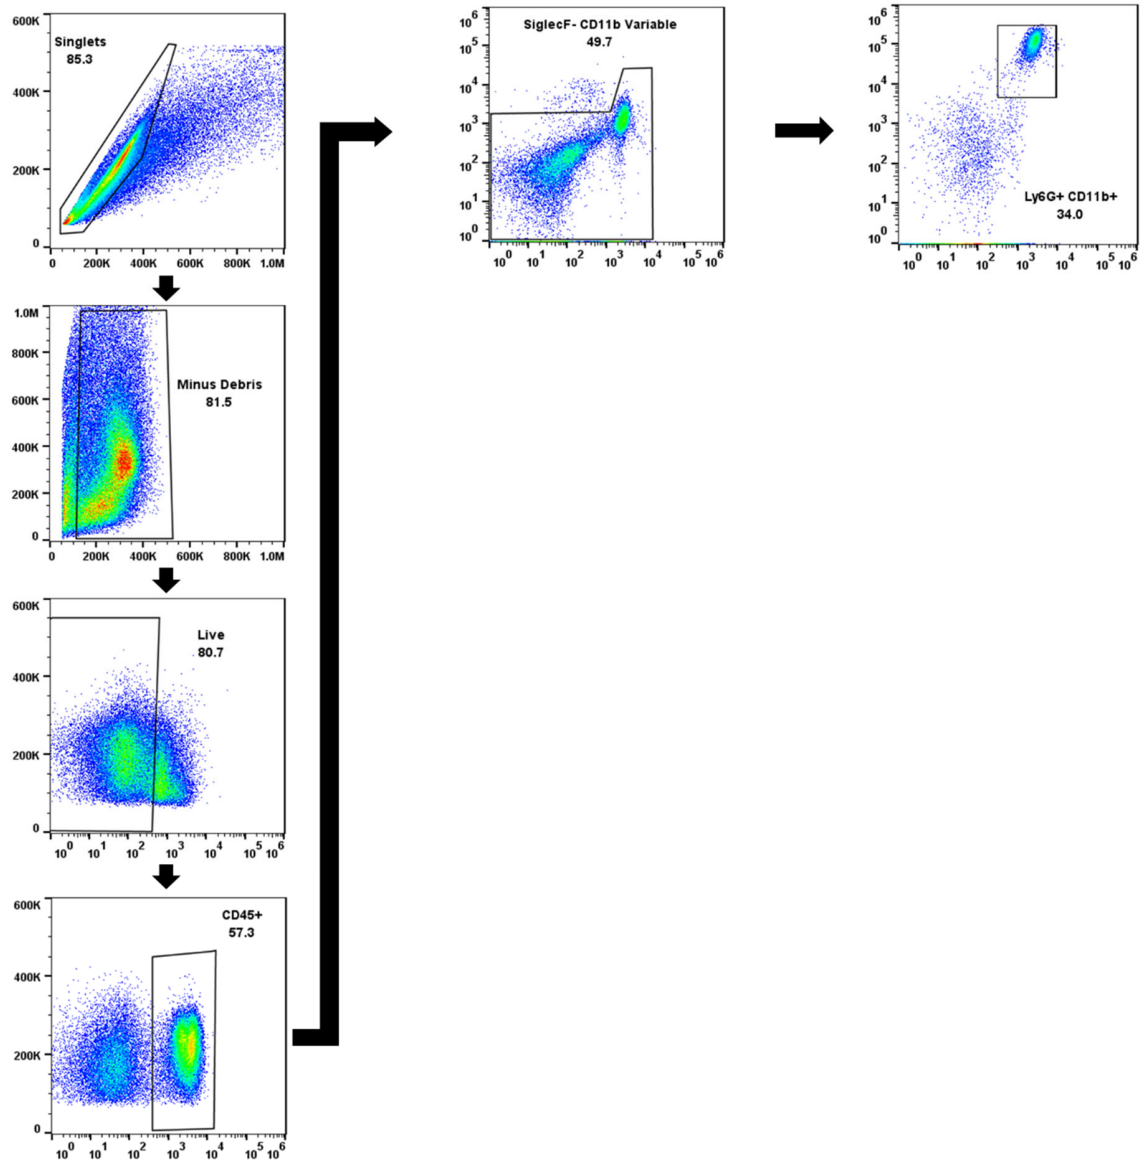

**Figure S3.** Flow gating strategy for the identification of Ly6G<sup>+</sup>CD11b<sup>+</sup> cells from lung cells.
